# Supplementary material for: Controlling the threshold voltage of β-Ga2O3 field-effect transistors via remote fluorine plasma treatment
Source: Royal Society of Chemistry journal article supplement (doi:10.1039/c9tc02468a), 2019-01-01
Supplement: c9tc02468a1.pdf [file c9tc02468a1.pdf]

## Supplementary Information

### Controlling the threshold voltage of $\beta$ -Ga<sub>2</sub>O<sub>3</sub> field-effect transistors *via* remote fluorine plasma treatment

Janghyuk Kim<sup>†</sup>, Marko J. Tadjer<sup>‡</sup>, Michael A. Mastro<sup>‡</sup> and Jihyun Kim<sup>†,\*</sup>

<sup>†</sup>Department of Chemical and Biological Engineering, Korea University, Seoul 02841 Korea

<sup>‡</sup>US Naval Research Laboratory, 4555 Overlook Ave. SW, Washington, DC 20375 USA

### Corresponding Author

\*E-mail: [hyunhyun7@korea.ac.kr](mailto:hyunhyun7@korea.ac.kr) (Jihyun Kim)

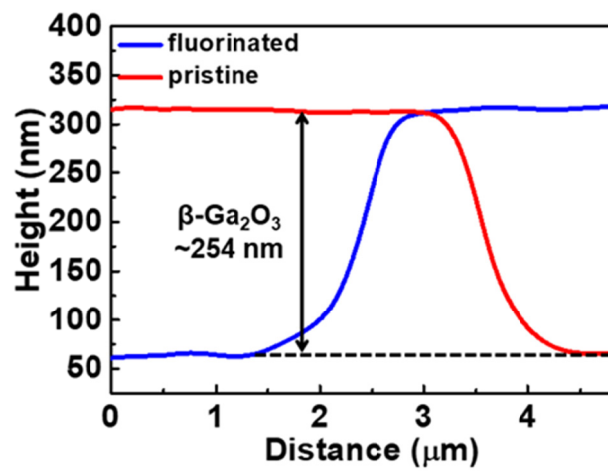

**Figure S1** Height profile of pristine and fluorinated  $\beta\text{-Ga}_2\text{O}_3$  flakes.

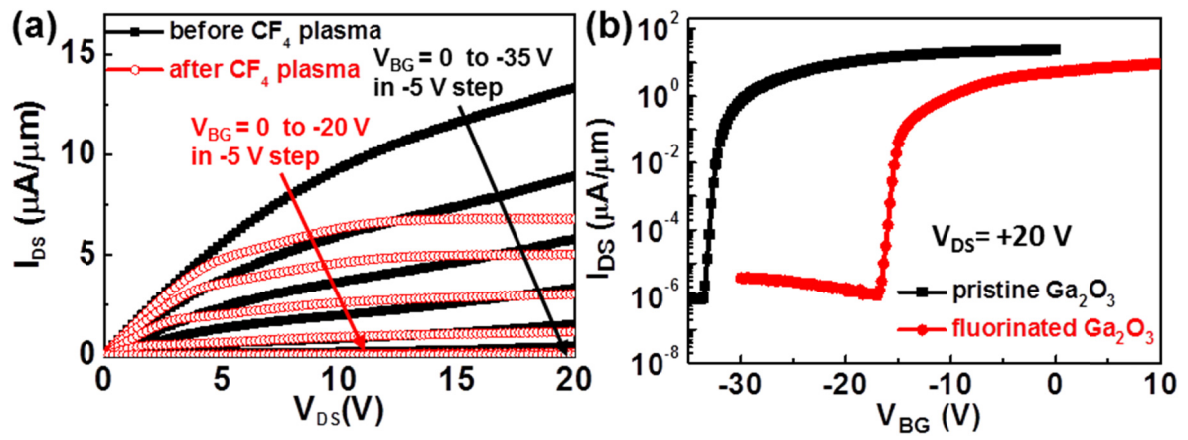

**Figure S2** (a)  $I_{\text{DS}}-V_{\text{DS}}$  output and (b) transfer characteristics of back-gated  $\beta$ - $\text{Ga}_2\text{O}_3$  MOSFETs before and after the  $\text{CF}_4$  plasma treatment.

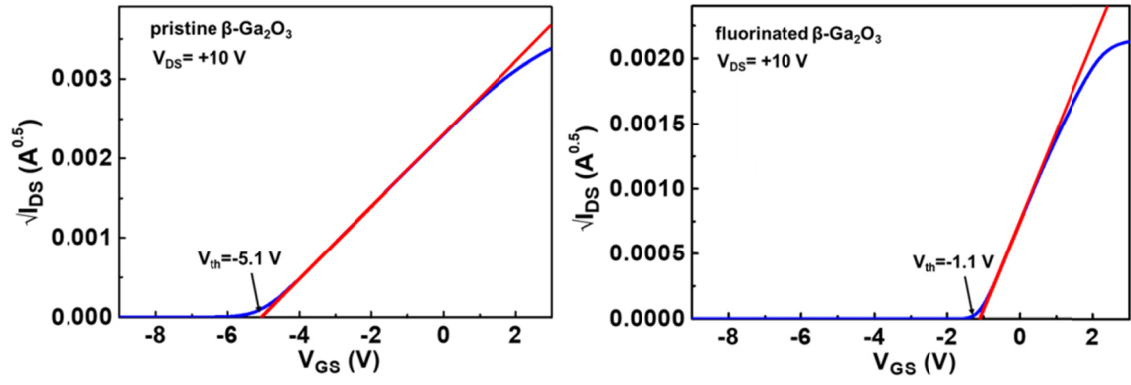

**Figure S3**  $I_D^{1/2}$  vs  $V_{GS}$  output characteristics of the pristine and fluorinated  $\beta\text{-Ga}_2\text{O}_3$  MISFETs.
